# Supplementary figures and images for: Erythropoietin signaling regulates heme biosynthesis
Source: eLife journal article supplement (doi:10.7554/elife.24767), 2017-05-29

Figure 3 - Figure Supplement 1

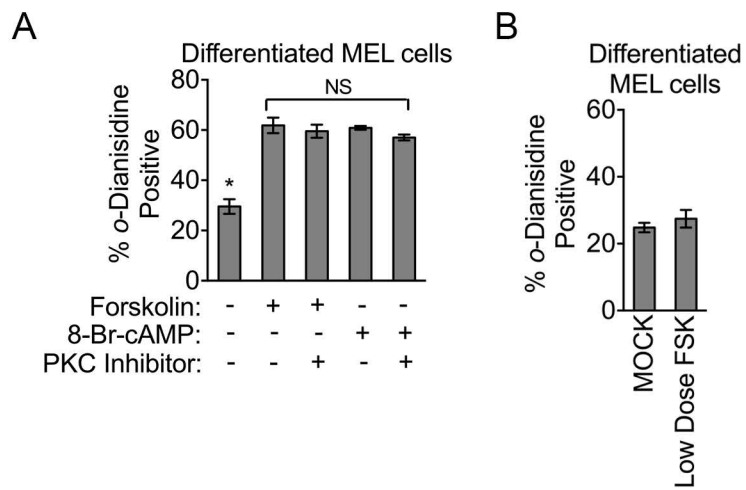

Supplement: supp [file elife_poa_e24767_Figure_3_figure_supplement_1.pdf › elife_poa_e24767_Figure_3_figure_supplement_1.pdf]

Figure 4 - Figure Supplement 1

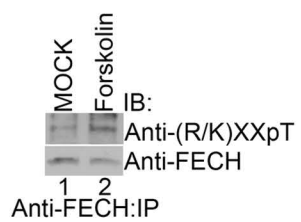

Supplement: supp [file elife_poa_e24767_Figure_4_figure_supplement_1.pdf › elife_poa_e24767_Figure_4_figure_supplement_1.pdf]

Figure 5 - Figure Supplement 1

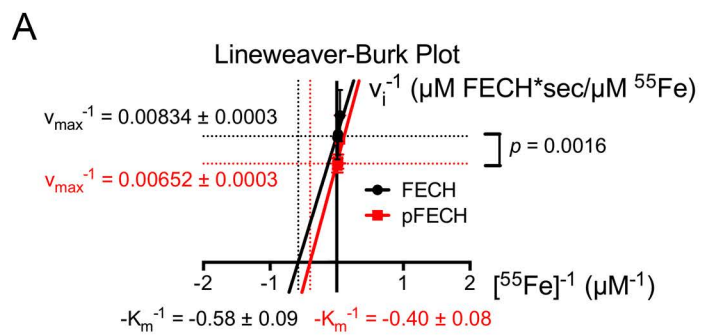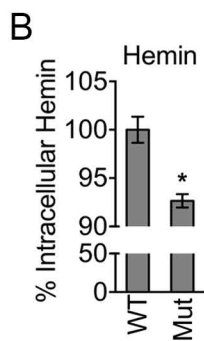

Supplement: supp [file elife_poa_e24767_Figure_5_figure_supplement_1.pdf › elife_poa_e24767_Figure_5_figure_supplement_1.pdf]
